# Supplementary material for: Technical Note: Improved volume and derived value calculations for polished zircon
Source: Copernicus journal article supplement (doi:10.5194/gchron-2024-33), 2024-12-06
Supplement: Supplementary file 1 [file gchron-2024-33-supplement.zip]

## Sheet: Sheet 1
Table S1. Example data used for method comparison																																													Comparison with other methods
Input Data																			Derived data and values calculated using methods in this study. See text for details.																										Ketcham et al. (2011) No polishing correction			Reiners et al. (2007)
Analysis Session	Grain	Length 1	Width 1	Length 2	Width 2	Geometry	Np	Length P	Width P	Grind Depth	Orientation	Crystal Fragment?	U	± 1σ	Th	± 1σ	147Sm	± 1σ	Volume	± 1σ	RSV	± 1σ	Mass	± 1σ	U	± 1σ	Th	± 1σ	Sm	± 1σ	eU	± 1σ	FT,238	± 1σ	FT,235	± 1σ	FT,232	± 1σ	FT,147	± 1σ	Combined FT	± 1σ	RFT	± 1σ	eU	± 1σ	Combined FT	Combined FT
		(µm)	(µm)	(µm)	(µm)			(µm)	(µm)	(µm)			(ng)	(ng)	(ng)	(ng)	(ng)	(ng)	(µm3)	(µm3)	(µm)	(µm)	(g)	(g)	(ppm)	(ppm)	(ppm)	(ppm)	(ppm)	(ppm)	(ppm)	(ppm)											(µm)	(µm)	(ppm)	(ppm)
1	z005	150	126	164	63	3	0	NA	NA	88.09	1	No	0.406	0.008	0.425	0.007	0.006	0.001	1246266	162015	55.5674	7.22376	5.79514e-06	7.53368e-07	70.0587	9.21166	73.3374	9.61007	1.03535	0.00126823	87.5216	10.3361	0.804184	0.0241255	0.775327	0.0310131	0.771004	0.0385502	0.937072	0.00937072	0.796688	0.0208938	59.307	4.74456	85.9	18.039	0.77	0.849238
1	z007	133	71	132	71	1	0	133	71	88.09	2	No	0.226	0.004	0.239	0.017	0.004	0.008	349729	73443	50.6383	10.6341	1.62624e-06	3.4151e-07	138.971	29.2874	146.965	32.585	2.45966	0.00804398	173.969	33.3235	0.771936	0.0231581	0.736176	0.029447	0.730774	0.029231	0.929564	0.00929564	0.762574	0.0241957	50.6532	4.05226	171.6	36.036	0.71	0.791714
1	z012	213	120	192	120	1	0	213	120	88.09	2	No	0.253	0.008	0.378	0.008	0.908	0.26	1.4687e+06	308427	83.293	17.4915	6.82945e-06	1.43418e-06	37.0455	7.86724	55.3486	11.6821	132.954	0.322427	51.3219	9.71465	0.860475	0.0258142	0.838242	0.0335297	0.83487	0.0333948	0.957153	0.00957153	0.853137	0.022025	83.2584	6.66067	48	10.08	0.82	0.864009
1	z015	201	128	194	147	1	0	201	128	88.09	2	No	0.938	0.011	3.96	0.048	0	0	1.92511e+06	404274	89.4894	18.7928	8.95178e-06	1.87987e-06	104.784	22.0389	442.37	93.0524	0	0	210.068	50.4628	0.870077	0.0261023	0.84935	0.033974	0.846206	0.0338482	0.960118	0.00960118	0.857727	0.0213638	89.449	7.15592	207.5	43.575	0.83	0.865261
1	z017	216	117	193	117	1	0	216	117	88.09	2	Yes	1.51	0.029	3.19	0.082	0	0	1.4037e+06	294778	81.8205	17.1823	6.52722e-06	1.37072e-06	231.339	48.7839	488.723	103.398	0	0	347.655	70.1737	0.857985	0.0257396	0.835364	0.0334146	0.831934	0.0332774	0.956383	0.00956383	0.848702	0.0210218	81.7945	6.54356	332.6	69.846	0.82	0.860954
1	z021	180	132	164	129	2	0	NA	NA	88.09	2	Yes	1.58	0.055	2.04	0.027	0	0	2.67149e+06	561012	91.5629	19.2282	1.24224e-05	2.60871e-06	127.189	27.0742	164.219	34.5545	0	0	166.274	31.8934	0.896865	0.0269059	0.880726	0.035229	0.878283	0.0439142	0.967931	0.00967931	0.892029	0.0240499	112.85	9.02801	178.8	37.548	0.84	0.864371
1	z024	196	80	190	86	1	0	196	80	88.09	2	No	0.6	0.016	0.578	0.009	0	0	695255	146004	60.689	12.7447	3.23294e-06	6.78917e-07	185.59	39.2868	178.785	37.6479	0	0	228.14	43.368	0.809213	0.0242764	0.779096	0.0311638	0.774539	0.0309816	0.941215	0.00941215	0.801814	0.0210309	60.7284	4.85827	227.3	47.733	0.76	0.825695
1	z031	204	95	203	113	1	0	204	95	88.09	2	No	0.423	0.016	0.387	0.018	0	0	1.14165e+06	239746	71.932	15.1057	5.30867e-06	1.11482e-06	79.681	17.0023	72.8997	15.6799	0	0	97.0312	18.6438	0.838696	0.0251609	0.813096	0.0325238	0.809218	0.0323687	0.950394	0.00950394	0.832625	0.0249927	71.9499	5.75599	96.4	20.244	0.8	0.847131
1	z033	132	124	129	100	2	0	NA	NA	88.09	2	No	0.517	0.009	0.517	0.01	0	0	1.53461e+06	322269	77.3112	16.2354	7.13595e-06	1.49855e-06	72.4501	15.2667	72.4501	15.2789	0	0	89.6932	16.9892	0.866661	0.0259998	0.845981	0.0338392	0.842856	0.0421428	0.958333	0.00958333	0.861449	0.0226548	87.2308	6.97847	85.7	17.997	0.82	0.843105
1	z035	191	97	183	144	2	0	NA	NA	88.09	2	No	5.94	0.089	9.78	0.81	0	0	2.3063e+06	484323	89.8072	18.8595	1.07243e-05	2.2521e-06	553.883	116.611	911.948	205.865	0	0	770.926	153.898	0.88116	0.0264348	0.862607	0.0345043	0.8598	0.04299	0.963004	0.00963004	0.874642	0.0290126	97.9313	7.8345	1246.7	261.807	0.8	0.845893
1	z039	138	92	164	89	2	0	NA	NA	88.09	2	Yes	0.519	0.021	2.74	0.12	0	0	1.34401e+06	282242	74.3062	15.6043	6.24964e-06	1.31242e-06	83.0448	17.7602	438.425	94.0502	0	0	187.39	49.2	0.86505	0.0259515	0.844099	0.033764	0.840933	0.0420467	0.957857	0.00957857	0.851276	0.0285645	86.3247	6.90598	273	57.33	0.76	0.818755
1	z041	182	149	177	128	2	0	NA	NA	88.09	2	No	1.28	0.033	4.37	0.074	0	0	2.43218e+06	510757	244.823	51.4129	1.13096e-05	2.37502e-06	113.178	23.9458	386.396	81.4066	0	0	205.14	46.3749	0.798655	0.0239597	0.767635	0.0307054	0.762955	0.0381478	0.936929	0.00936929	0.782011	0.0220633	57.6105	4.60884	156.9	32.949	0.85	0.869713
1	z045	161	111	161	103	3	0	NA	NA	88.09	2	Yes	0.995	0.025	0.676	0.023	0	0	3.32136e+06	431777	84.8804	11.0344	1.54443e-05	2.00776e-06	64.425	8.53024	43.7701	5.88177	0	0	74.8422	8.99992	0.00253698	7.61093e-05	0.0034183	0.000136732	0.00356374	0.000178187	0.000237722	2.37722e-06	0.00270882	7.75084e-05	9.57516	0.766012	134.2	28.182	0.81	0.848706
1	z049	169	131	165	75	2	0	NA	NA	88.09	2	Yes	0.734	0.016	0.822	0.082	0	0	1.44621e+06	303703	77.0929	16.1895	6.72486e-06	1.41222e-06	109.147	23.0441	122.233	28.4179	0	0	138.239	26.893	0.854009	0.0256203	0.831358	0.0332543	0.827935	0.0413968	0.954403	0.00954403	0.847843	0.0318175	79.6359	6.37087	87.6	18.396	0.83	0.856628
1	z050	186	109	184	113	1	0	186	109	88.09	2	No	0.467	0.006	0.817	0.02	0	0	1.18807e+06	249494	76.6149	16.0891	5.52452e-06	1.16015e-06	84.5323	17.785	147.886	31.2664	0	0	119.729	23.4301	0.848418	0.0254525	0.824306	0.0329722	0.82065	0.032826	0.953422	0.00953422	0.839612	0.0206817	76.6009	6.12807	118.1	24.801	0.81	0.851805
1	z052	202	73	202	73	1	0	202	73	88.09	2	No	0.301	0.004	0.239	0.006	0	0	563632	118363	55.65	11.6865	2.62089e-06	5.50387e-07	114.847	24.166	91.1904	19.2863	0	0	136.55	25.9331	0.792231	0.0237669	0.759553	0.0303821	0.754613	0.0301845	0.935901	0.00935901	0.785205	0.0208255	55.6961	4.45569	134.3	28.203	0.73	0.816775
1	z071	202	177	164	25	2	0	NA	NA	88.09	2	No	1.84	0.042	2.44	0.034	0	0	393689	82674.6	42.1169	8.84454	1.83065e-06	3.84437e-07	1005.11	212.315	1332.86	280.516	0	0	1322.33	252.598	0.661411	0.0198423	0.610553	0.0244221	0.602929	0.0301465	0.892951	0.00892951	0.645916	0.016846	33.6803	2.69442	104.3	21.903	0.87	0.865588
1	z073	123	92	122	90	1	0	123	92	88.09	2	No	0.388	0.007	0.198	0.006	0	0	528965	111083	59.6611	12.5288	2.45969e-06	5.16534e-07	157.744	33.2482	80.4981	17.0797	0	0	176.902	34.2764	0.805784	0.0241735	0.775069	0.0310028	0.770419	0.0308168	0.940198	0.00940198	0.800907	0.022644	59.635	4.7708	174.6	36.666	0.76	0.817362
1	z074	129	101	122	39	1	0	129	101	88.09	2	No	0.175	0.002	0.182	0.009	0	0	258838	54356	48.3224	10.1477	1.2036e-06	2.52755e-07	145.397	30.5786	151.213	32.6233	0	0	181.386	34.4725	0.760746	0.0228224	0.723126	0.028925	0.717439	0.0286976	0.926181	0.00926181	0.751008	0.0212522	48.2233	3.85786	179.2	37.632	0.64	0.815374
1	z081	130	105	113	128	1	0	NA	NA	88.09	1	Yes	0.133	0.01	0.359	0.004	0.003	0.001	801412	168297	67.3548	14.1445	3.72657e-06	7.82579e-07	35.6897	7.96074	96.3353	20.2589	0.80503	0.00118191	58.6242	12.6907	0.827623	0.0248287	0.800221	0.0320088	0.796067	0.0318427	0.947019	0.00947019	0.814653	0.0243044	67.28	5.3824	54.4	11.424	0.79	0.824771
1	z083	333	179	283	157	1	0	333	179	88.09	2	No	0.74	0.011	1.48	0.021	0.032	0.004	4.32572e+06	908402	123.115	25.8542	2.01146e-05	4.22407e-06	36.7892	7.74506	73.5784	15.4867	1.59088	0.00782038	54.314	10.8198	0.905423	0.0271627	0.890278	0.0356111	0.887979	0.0355192	0.971007	0.00971007	0.89941	0.021606	122.952	9.83616	51.6	10.836	0.87	0.903708
1	z085	187	127	164	115	1	0	187	127	88.09	2	No	0.321	0.01	0.871	0.02	0.017	0.003	1.27471e+06	267690	81.4362	17.1016	5.92741e-06	1.24476e-06	54.1551	11.497	146.944	31.0422	2.86803	0.00466314	89.1517	19.0138	0.857282	0.0257185	0.834535	0.0333814	0.831085	0.0332434	0.956176	0.00956176	0.846484	0.0214295	81.3868	6.51094	84	17.64	0.81	0.858498
1	z093	215	124	226	64	1	0	215	124	88.09	2	No	0.625	0.013	1.01	0.046	0.024	0.003	916239	192410	72.2355	15.1695	4.26051e-06	8.94708e-07	146.696	30.9569	237.061	50.9401	5.63313	0.00586529	203.163	39.6978	0.839206	0.0251762	0.81362	0.0325448	0.809741	0.0323896	0.950597	0.00950597	0.830323	0.0224231	72.1747	5.77397	201.5	42.315	0.76	0.86194
2	z002	121	93	114	93	1	0	121	93	115.14	2	No	0.002	0.001	0.126	0.005	NA	NA	532111	111743	59.5661	12.5089	2.47432e-06	5.19607e-07	0.808304	0.438351	50.9231	10.8831	NA	NA	12.928	5.32742	0.805465	0.024164	0.774696	0.0309879	0.770038	0.0308015	0.940103	0.00940103	0.772184	0.125639	59.5225	4.7618	12.8	2.688	0.73	0.797713
2	z003	207	194	31	185	1	0	207	194	115.14	2	Yes	0.333	0.006	0.486	0.044	NA	NA	1.20702e+06	253474	62.2803	13.0789	5.61265e-06	1.17866e-06	59.3303	12.5051	86.5902	19.8018	NA	NA	79.9388	15.8019	0.81453	0.0244359	0.785433	0.0314173	0.781037	0.0312415	0.94273	0.0094273	0.805078	0.0273565	62.5169	5.00135	43.1	9.051	0.84	0.867851
2	z006	274	221	199	33	3	1	NA	NA	115.14	1	No	2.058	0.043	2.067	0.032	NA	NA	1.31886e+06	171452	26.9084	3.4981	6.13271e-06	7.97252e-07	335.578	44.185	337.045	44.1255	NA	NA	415.795	49.1499	0.581496	0.0174449	0.516994	0.0206798	0.507258	0.0253629	0.868725	0.00868725	0.565194	0.0149498	26.8041	2.14433	404.5	84.945	0.7	0.894871
2	z008	118	78	114	68	1	0	118	78	115.14	2	Yes	0.112	0.002	0.115	0.011	NA	NA	322151	67651.8	51.19	10.7499	1.498e-06	3.14581e-07	74.7661	15.7576	76.7688	17.715	NA	NA	93.0371	17.9719	0.774192	0.0232258	0.738703	0.0295481	0.73334	0.0293336	0.930318	0.00930318	0.765086	0.0278167	51.1656	4.09325	91.9	19.299	0.71	0.796603
2	z009	311	257	314	212	1	0	311	257	115.14	2	No	0.57	0.022	1.333	0.019	NA	NA	8.93816e+06	1.87701e+06	158.342	33.2518	4.15625e-05	8.72812e-06	13.7143	2.92824	32.0722	6.75066	NA	NA	21.3475	4.40688	0.926411	0.0277923	0.914606	0.0365842	0.912813	0.0365125	0.977456	0.00977456	0.921263	0.0235212	158.023	12.6419	21.3	4.473	0.9	0.922855
2	z020	242	185	186	140	1	0	242	185	115.14	2	No	0.256	0.011	0.496	0.02	NA	NA	2.58981e+06	543860	105.605	22.177	1.20426e-05	2.52895e-06	21.2578	4.55664	41.187	8.80728	NA	NA	31.0603	6.26292	0.889772	0.0266932	0.872135	0.0348854	0.869457	0.0347783	0.966201	0.00966201	0.882905	0.0245373	105.469	8.43748	27.5	5.775	0.86	0.89381
2	z028	218	123	207	105	1	0	NA	NA	115.14	1	No	0.205	0.005	0.368	0.013	NA	NA	2.15301e+06	452133	84.8689	17.8225	1.00115e-05	2.10242e-06	20.4764	4.32896	36.7577	7.82757	NA	NA	29.2248	5.77255	0.862969	0.0258891	0.841094	0.0336438	0.837775	0.033511	0.957946	0.00957946	0.854849	0.0222048	84.7757	6.78205	43.7	9.177	0.81	0.868064
2	z032	199	174	191	114	1	0	199	174	115.14	2	No	0.515	0.014	0.6	0.021	NA	NA	2.02529e+06	425311	97.9315	20.5656	9.4176e-06	1.9777e-06	54.6848	11.5796	63.7105	13.5638	NA	NA	69.8479	13.3369	0.88117	0.0264351	0.86217	0.0344868	0.859286	0.0343714	0.963553	0.00963553	0.875855	0.0237482	97.8122	7.82498	69.7	14.637	0.84	0.886691
2	z040	164	136	156	17	1	0	164	136	115.14	2	No	0.559	0.023	1.028	0.066	NA	NA	193690	40674.8	30.2078	6.34365	9.00657e-07	1.89138e-07	620.658	132.816	1141.39	250.643	NA	NA	892.309	180.532	0.658446	0.0197534	0.621487	0.0248595	0.616543	0.0246617	0.883096	0.00883096	0.644718	0.0196192	33.9295	2.71436	871.9	183.099	1.96	0.848927
2	z047	273	158	271	71	1	0	273	158	115.14	2	No	0.336	0.012	0.438	0.007	NA	NA	1.59765e+06	335508	86.2551	18.1136	7.4291e-06	1.56011e-06	45.2276	9.63417	58.9574	12.4169	NA	NA	59.2594	11.3803	0.865164	0.0259549	0.843636	0.0337455	0.84037	0.0336148	0.958622	0.00958622	0.85867	0.0225316	86.1613	6.8929	58.8	12.348	0.79	0.889457
2	z051	234	161	155	214	1	0	NA	NA	115.14	1	No	1.539	0.023	0.735	0.018	NA	NA	2.92688e+06	614644	105.681	22.193	1.361e-05	2.85809e-06	113.079	23.8066	54.0045	11.4178	NA	NA	125.932	24.4496	0.889845	0.0266954	0.872217	0.0348887	0.86954	0.0347816	0.966225	0.00966225	0.887168	0.0245837	105.53	8.44236	105	22.05	0.87	0.890065
2	z058	104	73	100	13	1	0	104	73	115.14	2	Yes	0.046	0.004	0.037	0.008	NA	NA	50683.3	10643.5	21.8571	4.58999	2.35677e-07	4.94923e-08	195.182	44.3632	156.994	47.32	NA	NA	232.547	50.0102	0.516175	0.0154852	0.458452	0.0183381	0.450432	0.0180173	0.838094	0.00838094	0.503766	0.0350263	23.0369	1.84295	212.3	44.583	1.31	0.772388
2	z060	180	74	149	116	2	0	NA	NA	115.14	1	No	0.235	0.006	0.24	0.007	NA	NA	1.16601e+06	244863	62.261	13.0748	5.42196e-06	1.13861e-06	43.3423	9.16891	44.2645	9.38477	NA	NA	53.8772	10.2484	0.796155	0.0238846	0.764824	0.030593	0.7601	0.038005	0.936057	0.00936057	0.788147	0.0216386	56.8402	4.54721	81	17.01	0.75	0.815828
2	z070	246	179	250	90	1	0	246	179	115.14	2	No	1.943	0.046	4.4	0.049	NA	NA	2.09192e+06	439304	98.2289	20.6281	9.72745e-06	2.04276e-06	199.744	42.212	452.328	95.1224	NA	NA	307.398	62.7323	0.881525	0.0264458	0.86258	0.0345032	0.859704	0.0343882	0.963664	0.00963664	0.87342	0.021229	98.1101	7.84881	305.7	64.197	0.82	0.893138
2	z073	201	161	190	116	1	0	201	161	115.14	2	No	0.362	0.002	0.591	0.021	NA	NA	1.85836e+06	390255	94.428	19.8299	8.64136e-06	1.81469e-06	41.8915	8.80027	68.392	14.5665	NA	NA	58.1688	11.3112	0.876789	0.0263037	0.857099	0.034284	0.854111	0.0341644	0.962202	0.00962202	0.869906	0.0221242	94.3261	7.54609	56.7	11.907	0.83	0.882032
2	z076	185	141	169	84	1	0	185	141	115.14	2	No	1.317	0.04	0.921	0.018	NA	NA	1.09767e+06	230510	79.9989	16.7998	5.10415e-06	1.07187e-06	258.025	54.7491	180.441	38.0565	NA	NA	300.971	57.8114	0.854693	0.0256408	0.831524	0.033261	0.82801	0.0331204	0.955388	0.00955388	0.850128	0.0234411	79.9197	6.39358	299.1	62.811	0.8	0.869733
2	z078	224	184	224	80	1	0	224	184	115.14	2	Yes	0.8	0.029	0.722	0.025	NA	NA	1.72645e+06	362555	92.368	19.3973	8.028e-06	1.68588e-06	99.6512	21.2362	89.9352	19.1414	NA	NA	121.056	23.1987	0.874037	0.0262211	0.853906	0.0341562	0.85085	0.034034	0.961359	0.00961359	0.869307	0.0248653	92.2539	7.38031	121.5	25.515	0.81	0.892321
2	z089	204	211	209	64	1	0	204	211	115.14	2	No	1.515	0.032	4.298	0.085	NA	NA	1.46009e+06	306620	84.7178	17.7907	6.78944e-06	1.42578e-06	223.141	47.096	633.042	133.527	NA	NA	373.805	80.3831	0.862786	0.0258836	0.840907	0.0336363	0.837589	0.0335035	0.957873	0.00957873	0.85214	0.0209492	84.6708	6.77366	371.7	78.057	0.77	0.889611
2	z091	207	205	206	50	1	0	207	205	115.14	2	No	1.549	0.027	1.335	0.027	NA	NA	1.10826e+06	232735	73.1576	15.3631	5.15342e-06	1.08222e-06	300.577	63.3383	259.051	54.6525	NA	NA	362.231	68.7213	0.841445	0.0252433	0.8163	0.032652	0.812491	0.0324997	0.951226	0.00951226	0.835722	0.021844	73.2097	5.85678	358.1	75.201	0.75	0.890021
2	z095	95	78	100	74	1	0	NA	NA	115.14	1	Yes	0.083	0.002	0.087	0.007	NA	NA	345104	72471.8	48.6976	10.2265	1.60473e-06	3.36994e-07	51.722	10.9329	54.2146	12.1921	NA	NA	64.6251	12.4461	0.762643	0.0228793	0.725342	0.0290137	0.719704	0.0287882	0.926752	0.00926752	0.752935	0.0253592	48.6194	3.88955	74.5	15.645	0.71	0.784324
2	z096	214	187	204	167	1	0	214	187	115.14	2	Yes	0.851	0.007	2.062	0.85	NA	NA	3.36109e+06	705828	112.304	23.5838	1.56291e-05	3.2821e-06	54.4499	11.4432	131.934	61.0365	NA	NA	85.8501	31.8999	0.896331	0.0268899	0.879735	0.0351894	0.877216	0.0350886	0.968216	0.00968216	0.888943	0.0922131	112.156	8.97245	84.2	17.682	0.87	0.894214
2	z099	226	148	200	101	1	0	NA	NA	115.14	1	No	0.688	0.013	0.94	0.035	NA	NA	2.53401e+06	532142	93.6565	19.6679	1.17831e-05	2.47446e-06	58.3885	12.3111	79.775	17.014	NA	NA	77.375	14.8479	0.875774	0.0262732	0.855923	0.0342369	0.85291	0.0341164	0.961891	0.00961891	0.869596	0.022964	93.5519	7.48415	117.8	24.738	0.82	0.880286
2	z102	175	286	201	282	1	0	NA	NA	115.14	1	No	1.585	0.046	1.413	0.02	NA	NA	6.87776e+06	1.44433e+06	142.616	29.9493	3.19816e-05	6.71613e-06	49.5598	10.5065	44.1817	9.29921	NA	NA	60.075	11.4441	0.918314	0.0275494	0.905217	0.0362087	0.903228	0.0361291	0.97497	0.0097497	0.915262	0.0242617	142.352	11.3881	52	10.92	0.9	0.912456
2	z103	196	144	186	140	1	0	196	144	115.14	2	No	1.876	0.016	5.46	0.22	NA	NA	1.97274e+06	414276	92.8081	19.4897	9.17325e-06	1.92638e-06	204.508	42.982	595.209	127.274	NA	NA	346.167	75.5164	0.874671	0.0262401	0.854657	0.0341863	0.851619	0.0340648	0.961543	0.00961543	0.864794	0.0221437	92.7338	7.4187	336.9	70.749	0.84	0.874314
2	z107	151	136	159	102	1	0	151	136	115.14	2	No	0.592	0.023	0.578	0.004	NA	NA	1.12582e+06	236422	79.5454	16.7045	5.23507e-06	1.09936e-06	113.084	24.1505	110.409	23.1985	NA	NA	139.361	26.6708	0.853879	0.0256164	0.830586	0.0332234	0.827053	0.0330821	0.955134	0.00955134	0.848102	0.0229361	79.4735	6.35788	138.9	29.169	0.81	0.861836
2	z110	209	141	185	71	1	0	NA	NA	115.14	1	No	0.929	0.013	0.723	0.009	NA	NA	1.91213e+06	401547	84.9381	17.837	8.89141e-06	1.8672e-06	104.483	21.9901	81.3145	17.106	NA	NA	123.836	23.5203	0.86311	0.0258933	0.841269	0.0336508	0.837956	0.0335182	0.957981	0.00957981	0.858477	0.0221643	84.8615	6.78892	229.1	48.111	0.78	0.872766
2	z112	73	59	68	51	1	0	NA	NA	115.14	1	Yes	0.01	0.003	0.017	0.005	NA	NA	130242	27350.8	35.9349	7.54634	6.05626e-07	1.27181e-07	16.5119	6.04659	28.0701	10.1444	NA	NA	23.1925	7.81366	0.680777	0.0204233	0.631601	0.025264	0.624207	0.0249683	0.900806	0.00900806	0.663159	0.0724891	35.7922	2.86338	26.6	5.586	0.6	0.716609
2	z113	221	134	216	160	1	0	221	134	184	2	No	3.18	0.041	2.98	0.076	NA	NA	2.45287e+06	515103	95.3099	20.0151	1.14059e-05	2.39523e-06	278.804	58.6591	261.269	55.2697	NA	NA	340.986	64.5594	0.877972	0.0263392	0.858489	0.0343396	0.855532	0.0342213	0.962553	0.00962553	0.873274	0.022756	95.2441	7.61953	340.1	71.421	0.85	0.883611
2	z114	183	113	185	126	1	0	183	113	115.14	2	No	1.122	0.051	4.397	0.059	NA	NA	1.37853e+06	289492	79.6225	16.7207	6.41018e-06	1.34614e-06	175.034	37.6084	685.941	144.341	NA	NA	338.288	79.8309	0.854099	0.025623	0.830873	0.0332349	0.827351	0.033094	0.95518	0.0095518	0.840742	0.0225071	79.6082	6.36866	336.5	70.665	0.81	0.85398
2	z122	204	150	151	89	1	0	204	150	115.14	2	No	0.832	0.017	1.879	0.019	NA	NA	1.24073e+06	260554	83.5427	17.544	5.76941e-06	1.21158e-06	144.209	30.4269	325.683	68.4727	NA	NA	221.722	45.1848	0.860815	0.0258245	0.838605	0.0335442	0.835236	0.0334094	0.957279	0.00957279	0.851329	0.0205166	83.4588	6.6767	221	46.41	0.8	0.870168
2	z126	194	133	214	133	1	0	194	133	115.14	2	Yes	1.949	0.063	3.905	0.041	NA	NA	1.96962e+06	413620	91.3615	19.1859	9.15872e-06	1.92333e-06	212.803	45.2149	426.37	89.6494	NA	NA	314.279	62.9062	0.872718	0.0261815	0.852403	0.0340961	0.849321	0.0339728	0.960935	0.00960935	0.864644	0.021589	91.3048	7.30439	325.2	68.292	0.83	0.8733
2	z135	250	184	248	94	1	0	NA	NA	115.14	1	No	0.522	0.019	0.525	0.031	NA	NA	4.10957e+06	863010	108.022	22.6846	1.91095e-05	4.013e-06	27.3162	5.82194	27.4732	5.99311	NA	NA	33.8549	6.51485	0.892243	0.0267673	0.875003	0.0350001	0.872385	0.0348954	0.966957	0.00966957	0.887879	0.0277424	107.888	8.63105	61.7	12.957	0.83	0.897282
3	z004	361	134	357	67	1	0	361	134	184	2	No	1.06	0.024	1.32	0.036	NA	NA	1.68761e+06	354399	81.1411	17.0396	7.8474e-06	1.64795e-06	135.077	28.5305	168.209	35.6205	NA	NA	175.11	33.4061	0.856745	0.0257023	0.833905	0.0333562	0.830441	0.0332176	0.956016	0.00956016	0.850063	0.022084	81.0743	6.48594	174.7	36.687	0.78	0.893393
3	z006	157	121	164	44	1	0	157	121	184	2	No	0.942	0.012	1.17	0.013	NA	NA	447416	93957.4	56.9797	11.9657	2.08049e-06	4.36902e-07	452.779	95.2584	562.369	118.263	NA	NA	586.623	111.368	0.796605	0.0238982	0.764423	0.0305769	0.75955	0.030382	0.937383	0.00937383	0.787209	0.0193981	56.9024	4.55219	575	120.75	0.68	0.856268
3	z007	123	98	73	122	1	0	NA	NA	184	1	No	0.297	0.016	0.54	0.02	NA	NA	458864	96361.4	59.0042	12.3909	2.13372e-06	4.4808e-07	139.194	30.1772	253.08	53.967	NA	NA	199.427	40.0478	0.803493	0.0241048	0.772363	0.0308945	0.767649	0.030706	0.939529	0.00939529	0.791847	0.0228162	58.9259	4.71407	147.8	31.038	0.77	0.810812
3	z011	206	107	202	88	1	0	206	107	184	2	No	0.897	0.027	1.38	0.033	NA	NA	1.00576e+06	211210	73.4177	15.4177	4.67679e-06	9.82127e-07	191.798	40.6892	295.074	62.366	NA	NA	262.026	50.8067	0.84186	0.0252558	0.816723	0.0326689	0.812913	0.0325165	0.951395	0.00951395	0.833406	0.0215025	73.4009	5.87208	261.2	54.852	0.79	0.860472
3	z014	167	112	126	16	3	0	NA	NA	184	2	No	0.503	0.021	0.356	0.048	NA	NA	262528	34128.6	31.9118	4.14854	1.22076e-06	1.58698e-07	412.04	56.2597	291.623	54.6196	NA	NA	481.446	62.2509	0.690595	0.0207179	0.651312	0.0260525	0.645595	0.0322798	0.893382	0.00893382	0.682826	0.032786	37.1945	2.97556	455	95.55	0.45	0.845214
3	z018	124	122	78	135	1	0	NA	NA	184	1	No	0.351	0.012	0.422	0.019	NA	NA	645242	135501	66.9663	14.0629	3.00038e-06	6.30079e-07	116.985	24.8903	140.649	30.2075	NA	NA	150.46	28.9258	0.82663	0.0247989	0.799074	0.0319629	0.794897	0.0317959	0.946712	0.00946712	0.818757	0.0234595	66.8915	5.35132	111.7	23.457	0.79	0.832023
3	z023	246	158	229	53	1	0	246	158	184	2	No	0.753	0.026	3.13	0.072	NA	NA	1.04135e+06	218683	72.83	15.2943	4.84226e-06	1.01687e-06	155.506	33.0947	646.392	136.554	NA	NA	309.347	74.3859	0.840487	0.0252146	0.815092	0.0326037	0.811241	0.0324496	0.951	0.00951	0.825466	0.0217843	72.7575	5.8206	304.7	63.987	0.73	0.885755
3	z028	207	147	210	64	1	0	207	147	184	2	No	2.45	0.11	9.11	0.25	NA	NA	1.02707e+06	215686	76.3955	16.043	4.7759e-06	1.00294e-06	512.993	110.163	1907.5	403.98	NA	NA	966.976	225.782	0.84787	0.0254361	0.823625	0.032945	0.819947	0.0327979	0.953285	0.00953285	0.83428	0.0226649	76.315	6.1052	965.5	202.755	0.76	0.877808
3	z038	167	76	178	22	1	0	167	76	184	2	No	0.36	0.012	0.457	0.015	NA	NA	151016	31713.4	33.4918	7.03328	7.02226e-07	1.47467e-07	512.655	109.005	650.788	138.325	NA	NA	667.543	128.203	0.658342	0.0197503	0.606059	0.0242423	0.598211	0.0239284	0.893595	0.00893595	0.642867	0.0175303	33.3313	2.66651	639.5	134.295	0.5	0.81791
3	z042	192	117	187	59	1	0	192	117	184	2	No	0.621	0.018	0.855	0.06	NA	NA	684929	143835	66.4045	13.945	3.18492e-06	6.68833e-07	194.981	41.3343	268.452	59.4394	NA	NA	258.873	50.4914	0.825205	0.0247562	0.797439	0.0318976	0.793231	0.0317293	0.946263	0.00946263	0.816521	0.0255331	66.3421	5.30737	254.8	53.508	0.74	0.862579
3	z058	188	135	160	46	1	0	188	135	184	2	No	0.937	0.0074	3.99	0.14	NA	NA	565769	118812	61.1393	12.8393	2.63083e-06	5.52474e-07	356.162	74.8468	1516.63	322.908	NA	NA	717.12	174.408	0.810305	0.0243092	0.780235	0.0312094	0.77568	0.0310272	0.941639	0.00941639	0.79232	0.020591	61.0693	4.88554	701.5	147.315	0.69	0.862412
3	z059	136	91	148	42	1	0	136	91	184	2	No	0.163	0.011	0.186	0.016	NA	NA	284170	59675.6	49.425	10.3793	1.32139e-06	2.77492e-07	123.355	27.2093	140.761	31.9437	NA	NA	156.856	31.356	0.766016	0.0229805	0.729196	0.0291678	0.72363	0.0289452	0.927826	0.00927826	0.755864	0.0289885	49.3345	3.94676	154.3	32.403	0.65	0.827545
3	z062	105	73	109	37	1	0	105	73	184	2	No	0.136	0.009	0.195	0.016	NA	NA	151324	31778	40.6897	8.54483	7.03655e-07	1.47768e-07	193.276	42.5557	277.124	62.4806	NA	NA	259.232	52.3459	0.716967	0.021509	0.672911	0.0269164	0.666268	0.0266507	0.912366	0.00912366	0.702824	0.0256508	40.5659	3.24527	252.5	53.025	0.59	0.785991
3	z063	147	154	131	146	1	0	NA	NA	184	1	No	10.7	0.15	13.4	0.32	NA	NA	1.54749e+06	324973	86.0513	18.0708	7.19584e-06	1.51113e-06	1486.97	312.959	1862.19	393.58	NA	NA	1930.17	367.166	0.864861	0.0259458	0.843292	0.0337317	0.84002	0.0336008	0.958524	0.00958524	0.858527	0.0216979	85.9683	6.87747	1825.4	383.334	0.83	0.868545
3	z075	96	95	112	81	1	0	NA	NA	184	1	No	0.0165	0.002	0.0455	0.0044	NA	NA	493042	103539	54.9653	11.5427	2.29264e-06	4.81455e-07	7.19693	1.74505	19.8461	4.58833	NA	NA	11.9203	2.83827	0.789381	0.0236814	0.756149	0.0302459	0.751121	0.0300448	0.935095	0.00935095	0.773467	0.0341215	54.9222	4.39378	13.7	2.877	0.73	0.808506
Isotope data collected following standard whole-grain dissolution ICP-MS methods at the University of Colorado Thermochronology Research and Instrumentation Lab (e.g., Peak et al., 2023)
Analysis Session - Internal ID for analysis reference, e.g., U-Pb LA-ICP-MS data collection session, U-Th-Sm solution ICP-MS data collection session, etc.
Grain - Zircon grain analyzed.
Length 1 and 2 - Length is measured parallel to the c-axis and includes pyramidal terminations. It is measured twice on two perpendicular sides.
Width 1 and 2 - Width 1 is measured perpendicular to the c-axis. Width 2 is measured perpendicular to both the c-axis and width 1.
Grind Depth - the average depth of epoxy/sample removed while polishing the grain mounts. Determined by averaging measurements from 2-6 glass beads embedded in epoxy.
Orientation - orientation of the polishing pane to the crystallographic c-axis. 1 = Perpendicular to c-axis. 2 = Parallel to c-axis.
Geometry - idealized morphology as described as in Figure 3 of Ketcham et al. (2011). 1 = Ellipsoidal, 2 = Cylindrical, 3 = Tetragonal.
Length P - the long exis of the polished face. Only noted for ellipsoid grains polished parallel to the c-axis. Typically indistinguishable from Length 1.
Width P - the short axis of the polished face. Only noted for ellipsoid grains polished parallel to the c-axis. Typically indistinguisable from Width 1.
Np - the number of pyramidal terminations of the grain.
U - Total blank-corrected ng of 238U and 235U. Total 238U is measured and 235U is calculated assuming 235U = 238U/137.818 after Hiess et al. (2012).
Th - Total blank-corrected ng of 232Th
Sm - Total blank-corrected ng of 147Sm. In some cases Sm may not be measured if amounts are negligible (NA)
Uncertainties on U, Th, and Sm are reported as the 1σ standard deviation and include the propagated uncertainties on the measurements of the sample, blank, spike, and standard.
References cited in footnotes
Hiess, J., Condon, D.J., McLean, N., and Noble, S.R., 2012, 238U/235U Systematics in Terrestrial Uranium-Bearing Minerals: Science, v. 335, p. 1610–1615.
Ketcham, R.A., Gautheron, C., and Tassan-Got, L., 2011, Accounting for long alpha-particle stopping distances in (U-Th-Sm)/He geochronology: Refinement of the baseline case: Geochimica et Cosmochimica Acta, v. 75, p. 7779–7791, doi: 10.1016/j.gca.2011.10.011.
Peak, B.A., Flowers, R.M., and Macdonald, F.A., 2023, Ediacaran-Ordovician tectonic and geodynamic drivers of Great Unconformity exhumation on the southern Canadian Shield: Earth and Planetary Science Letters, v. 619, p. 118334, doi:10.1016/j.epsl.2023.118334.
